# Supplementary material for: CPT1A mediates radiation sensitivity in colorectal cancer
Source: eLife journal article supplement (doi:10.7554/elife.97827), 2024-08-07
Supplement: fig3-data2 [file elife-97827-fig3-data2-v1.zip]

**Figure 3- source data 1:** Western blots labelled with relevant bands analyzed in Figure 3A (anti-CPT1A and anti-β-actin)

**Figure 3- source data 1.1:** Original file for the western blot in Figure3A (anti-CPT1A)

**Figure 3- source data 1.2:** Original file for the western blot in Figure 3A (anti-β-actin)

**Figure 3- source data 1.3:** Original file for the western blot in Figure 3A (anti-CPT1A)

**Figure 3- source data 1.4:** Original file for the western blot in Figure3A (anti-β-actin)

**Figure 3- source data 2:** Western blots labelled with relevant bands analyzed in Figure 3H (anti-γH2A.X and anti-β-actin)

**Figure 3- source data 2.1:** Original file for the western blot in Figure 3H (anti-γH2A.X)

**Figure 3- source data 2.2:** Original file for the western blot in Figure 3H (anti-β-actin)

**Figure 3- source data 3:** Western blots labelled with relevant bands analyzed in Figure 3I (anti-γH2A.X and anti-β-actin)

**Figure 3- source data 3.1:** Original file for the western blot in Figure 3I (anti-γH2A.X)

**Figure 3- source data 3.1:** Original file for the western blot in Figure 3I (anti-γH2A.X)

**Figure 3- source data 3.2:** Original file for the western blot in Figure 3I (anti-β-actin)
