# Supplementary material for: CPT1A mediates radiation sensitivity in colorectal cancer
Source: eLife journal article supplement (doi:10.7554/elife.97827), 2024-08-07
Supplement: fig6-data2 [file elife-97827-fig6-data2-v1.zip]

**Figure 6- source data 1:** Western blots labelled with relevant bands analyzed in Figure 6A (anti-FOXM1, anti-CPT1A, anti-CAT, anti-SOD3, anti-SOD2, anti-SOD1 and anti-β-actin)

**Figure 6- source data 1.1:** Original file for the western blot in Figure 6A (anti-FOXM1)

**Figure 6- source data 1.2:** Original file for the western blot in Figure 6A (anti-FOXM1)

**Figure 6- source data 1.3:** Original file for the western blot in Figure 6A (anti-CPT1A)

**Figure 6- source data 1.4:** Original file for the western blot in Figure 6A (anti-CPT1A)

**Figure 6- source data 1.5:** Original file for the western blot in Figure 6A (anti-CAT)

**Figure 6- source data 1.6:** Original file for the western blot in Figure 6A (anti-CAT)

**Figure 6- source data 1.7:** Original file for the western blot in Figure 6A (anti-SOD3)

**Figure 6- source data 1.8:** Original file for the western blot in Figure 6A (anti-SOD3)

**Figure 6- source data 1.9:** Original file for the western blot in Figure 6A (anti-SOD2)

**Figure 6- source data 1.10:** Original file for the western blot in Figure 6A (anti-SOD1)

**Figure 6- source data 1.11:** Original file for the western blot in Figure 6A (anti-SOD1)

**Figure 6- source data 1.12:** Original file for the western blot in Figure 6A (anti-β-actin)

**Figure 6- source data 2:** Western blots labelled with relevant bands analyzed in Figure 6D (anti-FOXM1, anti-CPT1A, anti-CAT, anti-SOD2, anti-SOD1 and anti-β-actin)

**Figure 6- source data 2.1:** Original file for the western blot in Figure 6D (anti- FOXM1)

**Figure 6- source data 2.2:** Original file for the western blot in Figure 6D (anti- CPT1A)

**Figure 6- source data 2.3:** Original file for the western blot in Figure 6D (anti- CAT)

**Figure 6- source data 2.4:** Original file for the western blot in Figure 6D (anti- SOD2)

**Figure 6- source data 2.5:** Original file for the western blot in Figure 6D (anti- SOD1)

**Figure 6- source data 2.6:** Original file for the western blot in Figure 6D (anti-β-actin)
