# Supplementary figures and images for: CPT1A mediates radiation sensitivity in colorectal cancer
Source: eLife journal article supplement (doi:10.7554/elife.97827), 2024-08-07

### Figure 1C

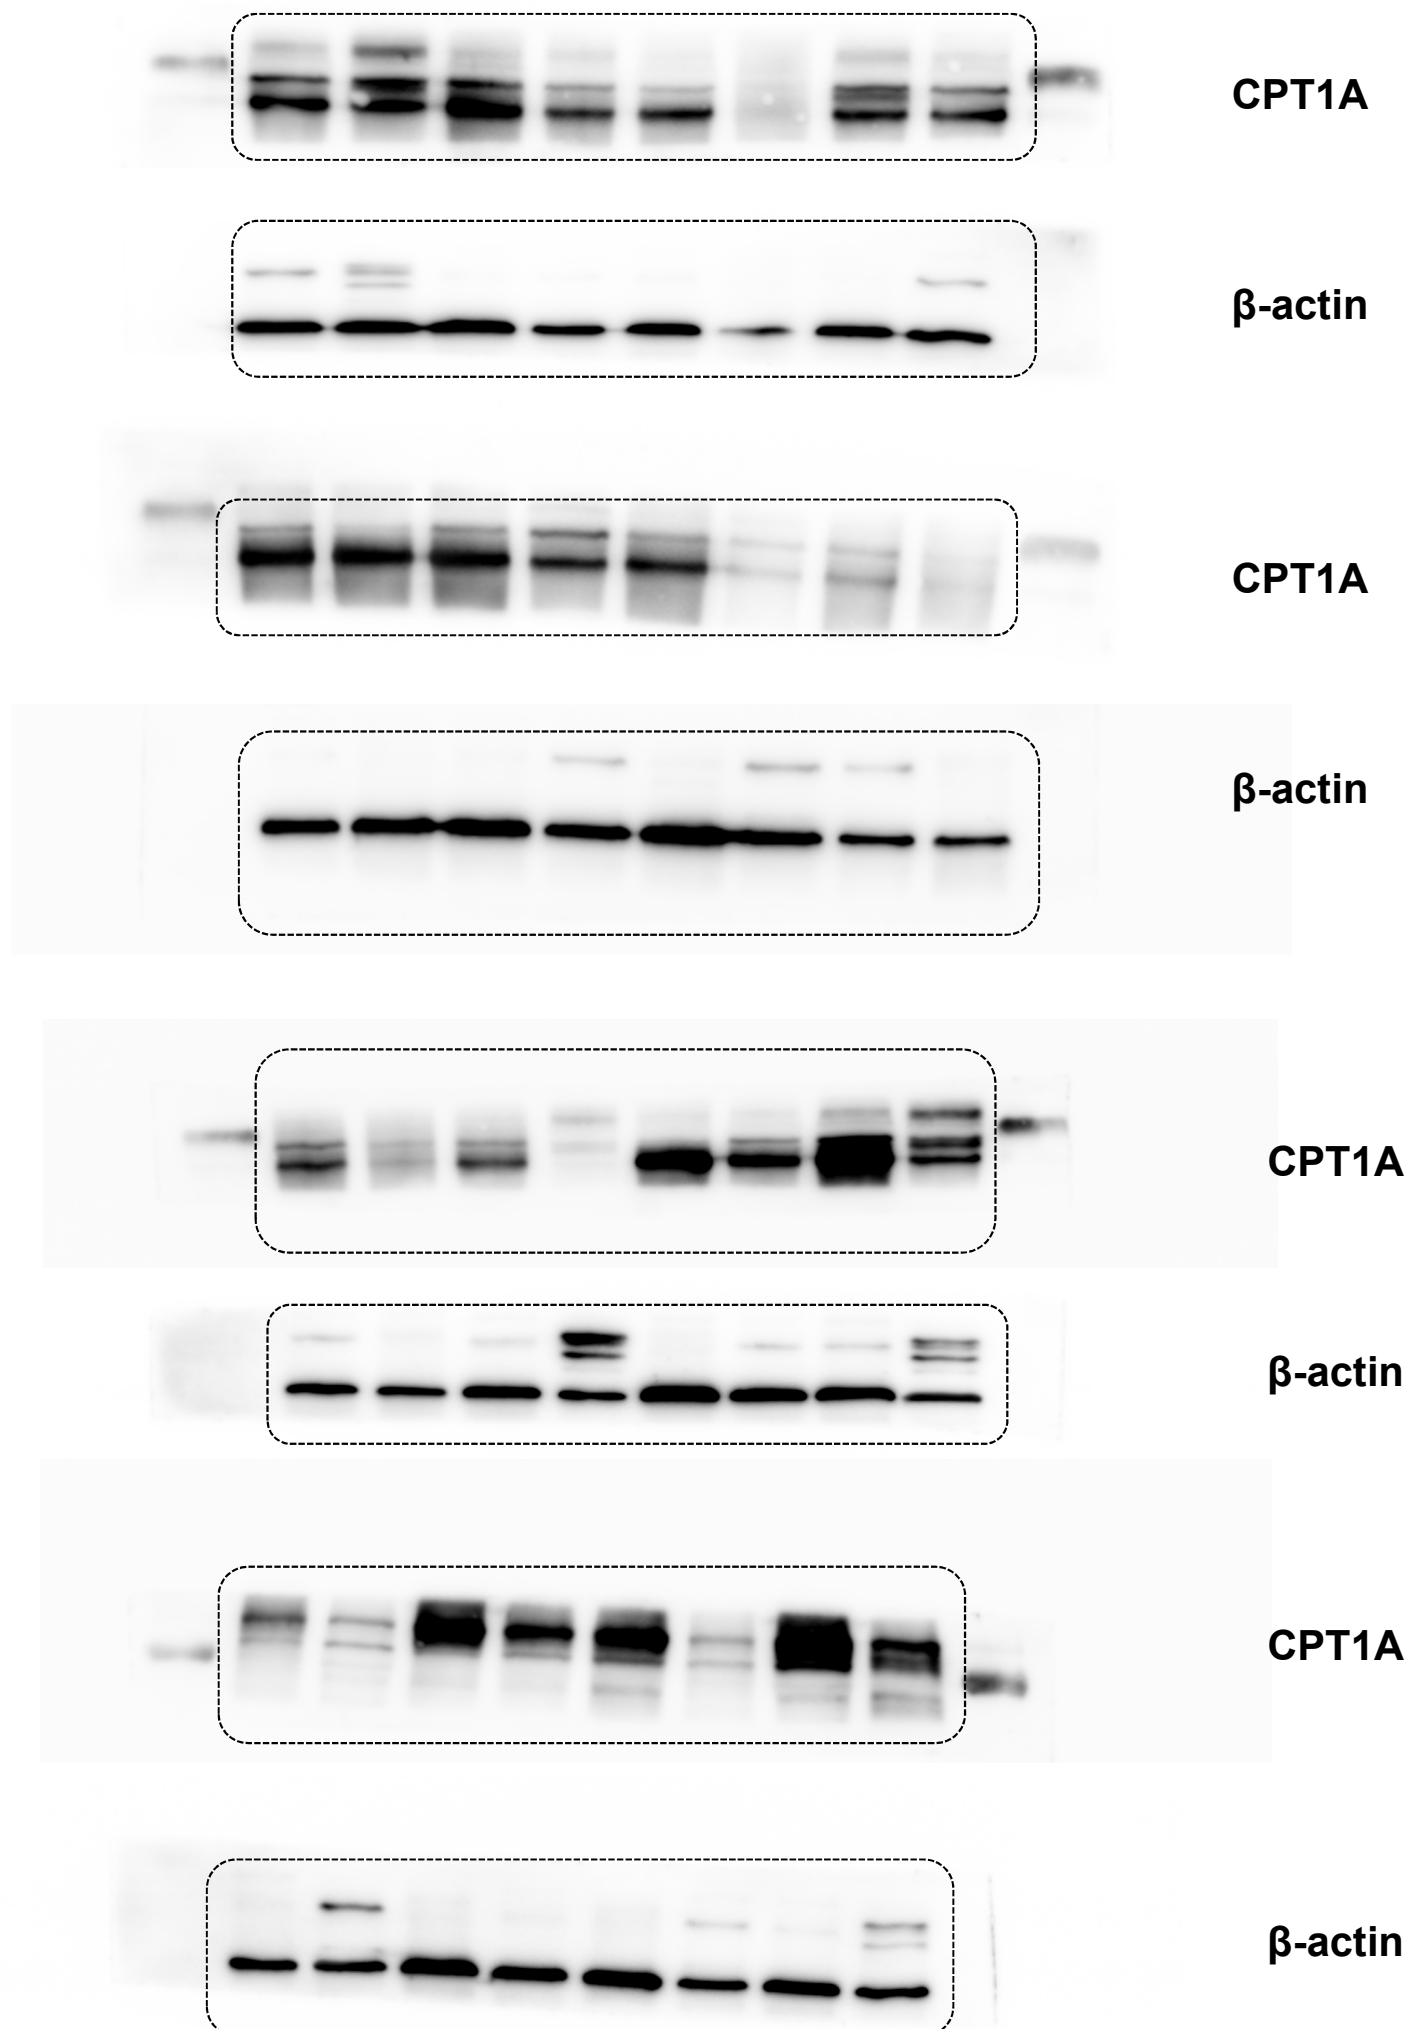

Supplement: fig1-data2 [file elife-97827-fig1-data2-v1.zip]

Figure 3l

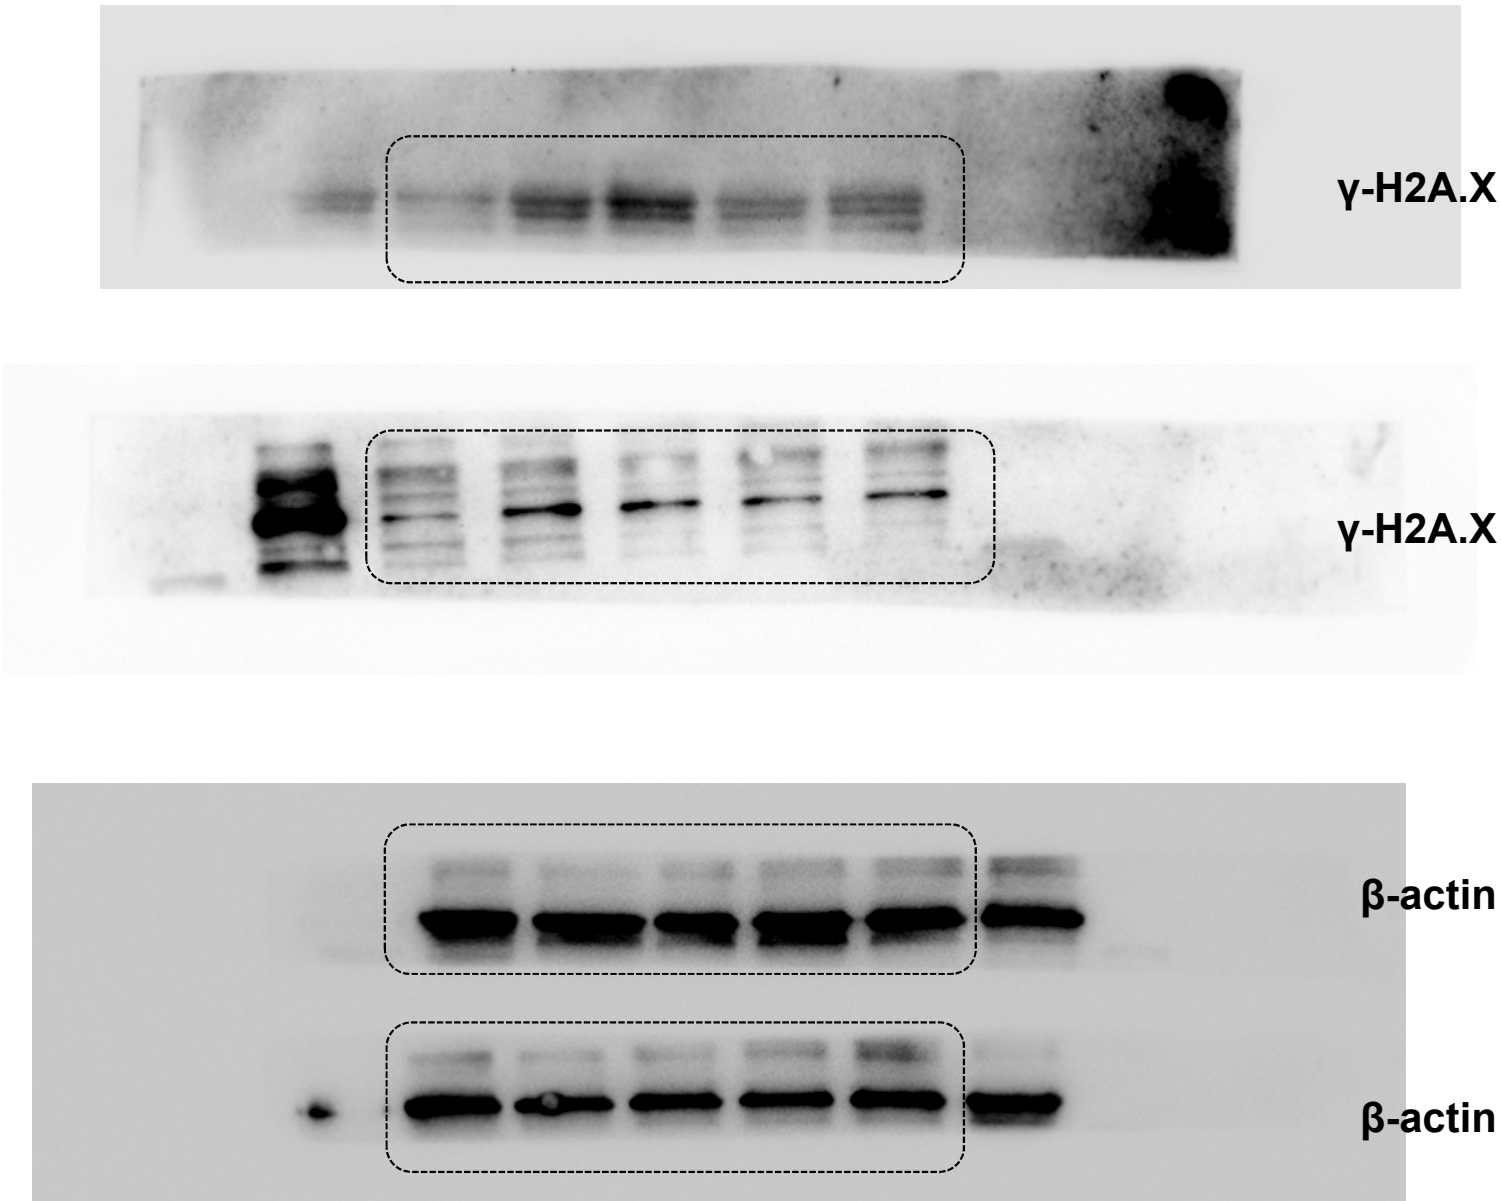

Supplement: fig3-data2 [file elife-97827-fig3-data2-v1.zip]

Figure 3A

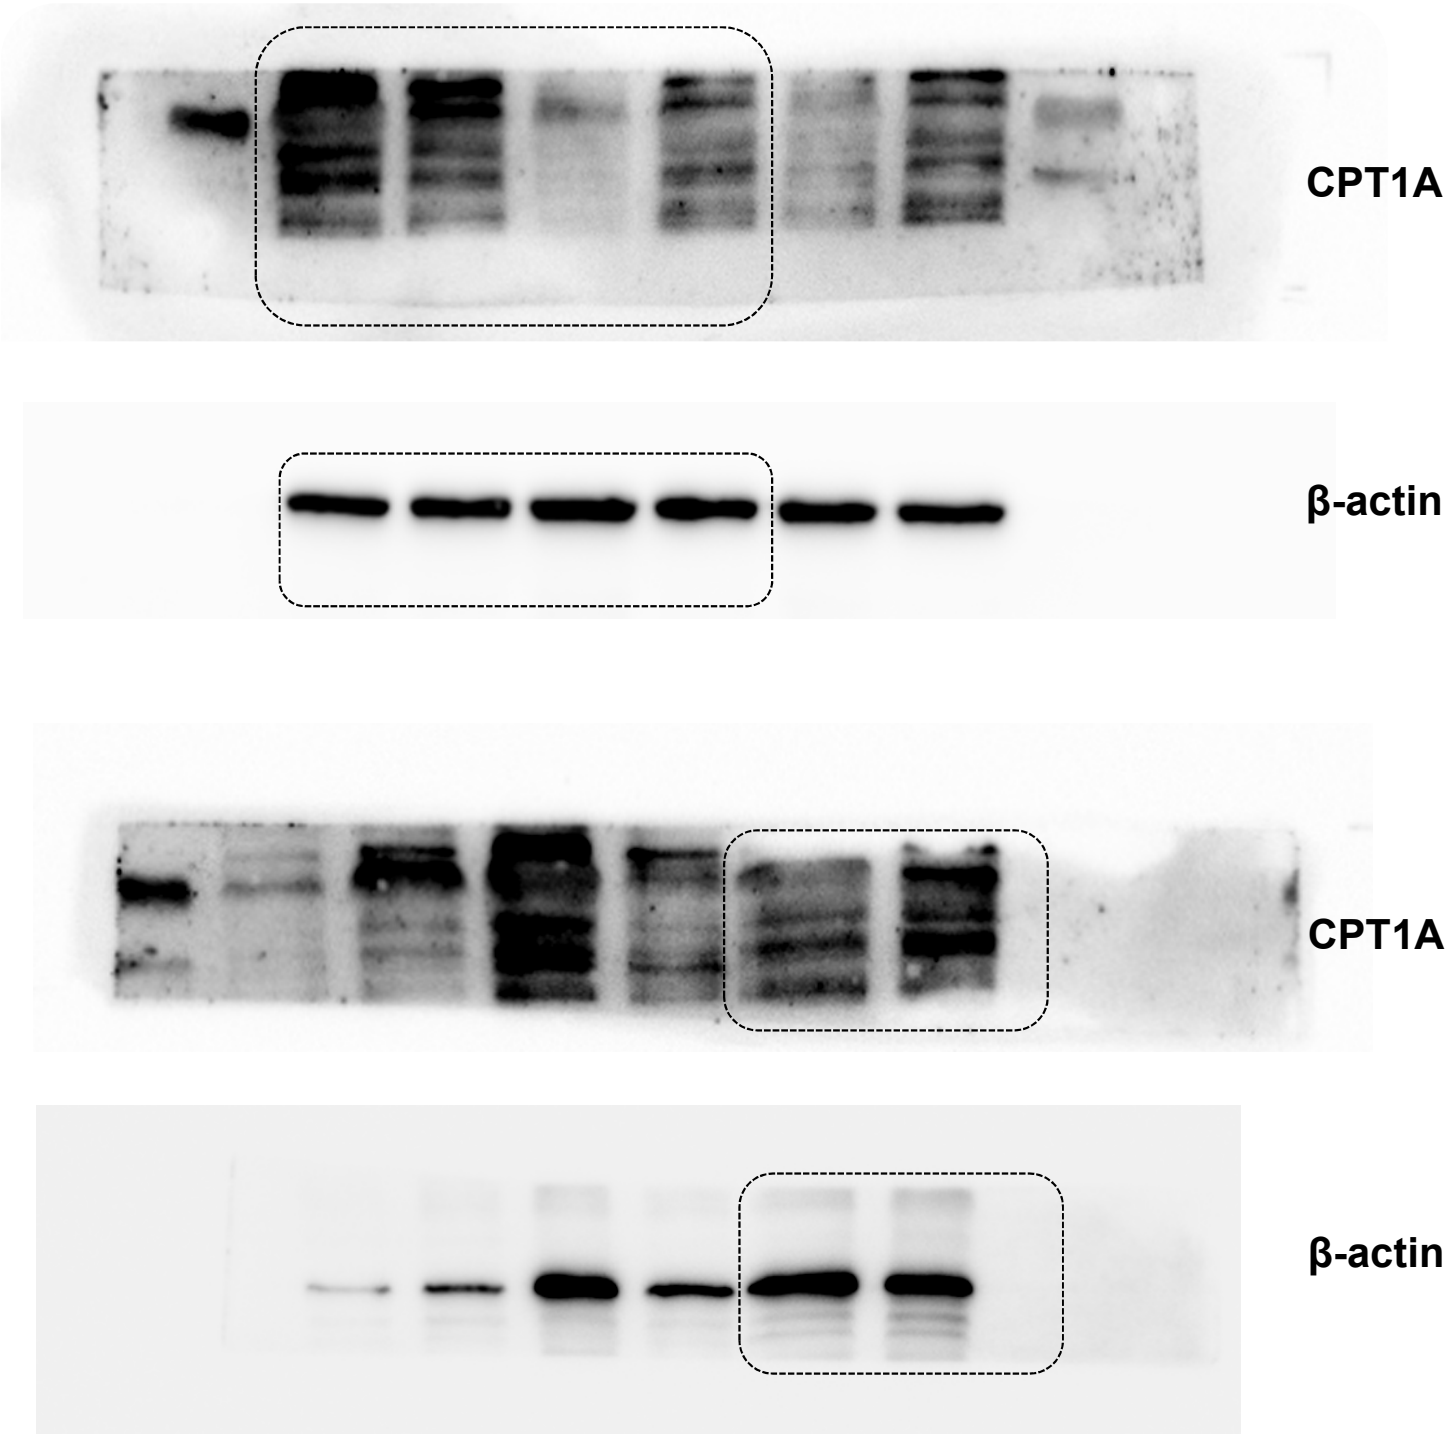

Supplement: fig3-data2 [file elife-97827-fig3-data2-v1.zip]

Figure 3H

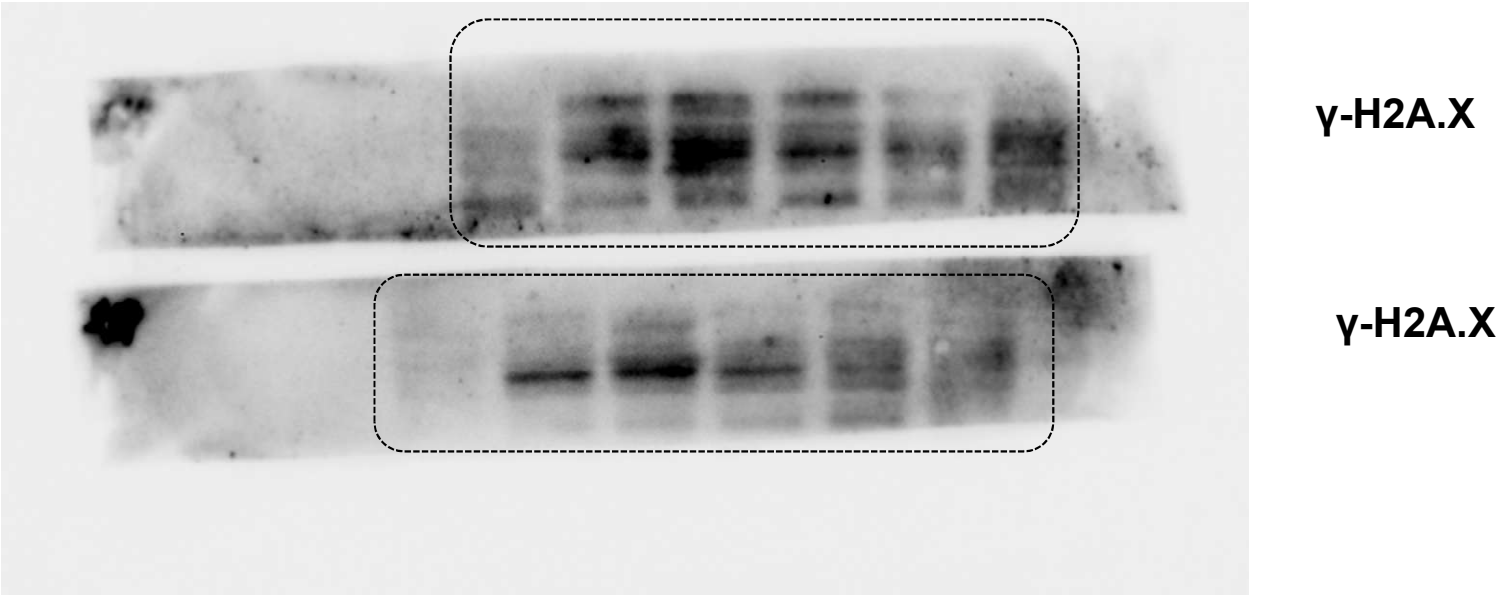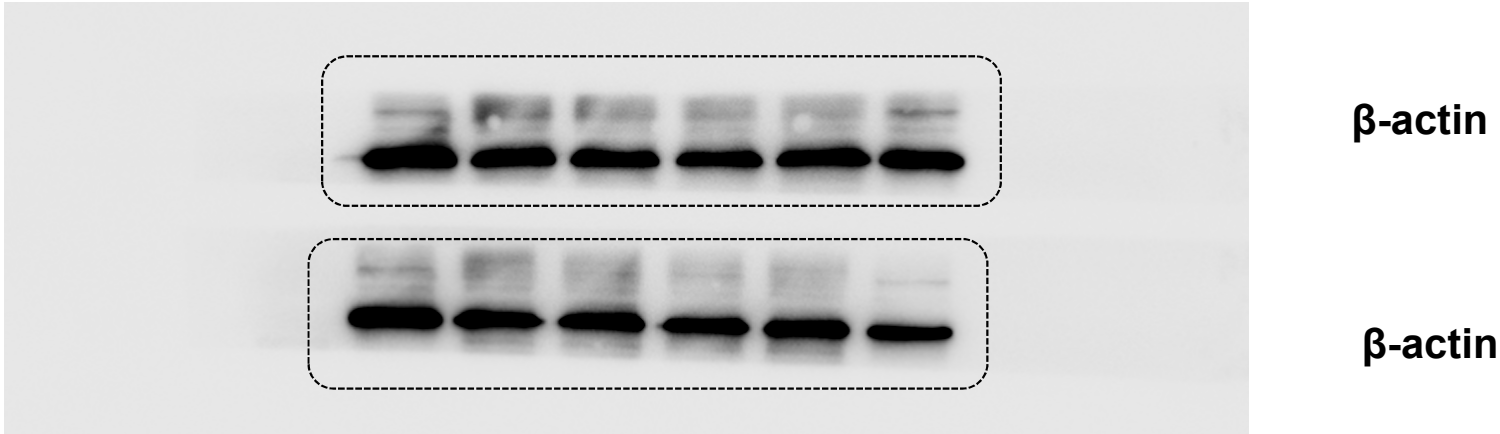

Supplement: fig3-data2 [file elife-97827-fig3-data2-v1.zip]

Figure 3-figure supplement 1A

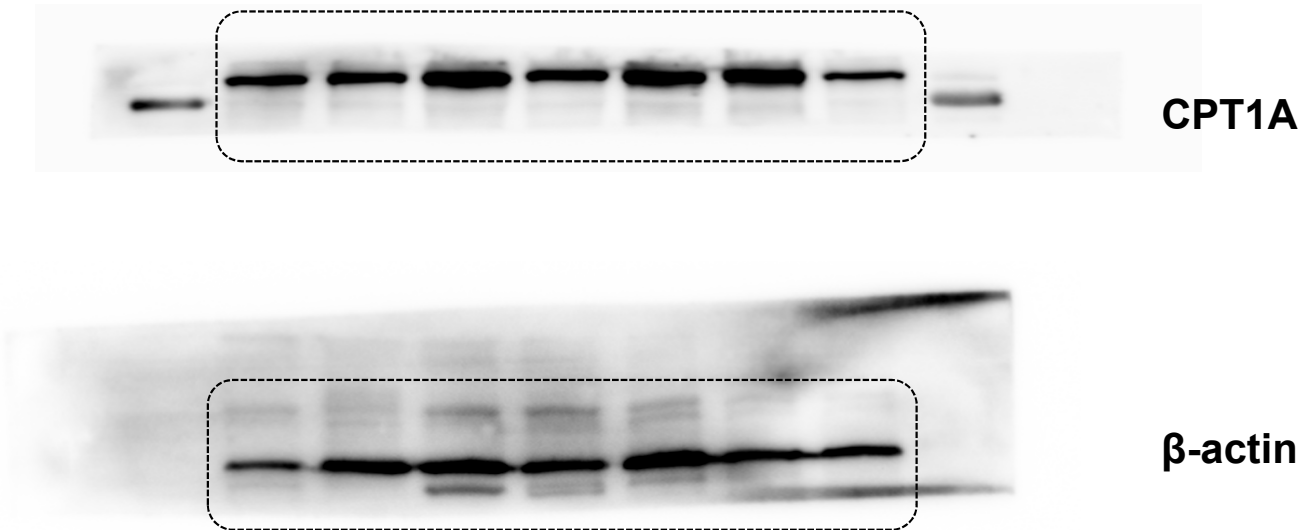

Supplement: fig3-figsupp1-data2 [file elife-97827-fig3-figsupp1-data2-v1.zip]

Figure 3-figure supplement 2D

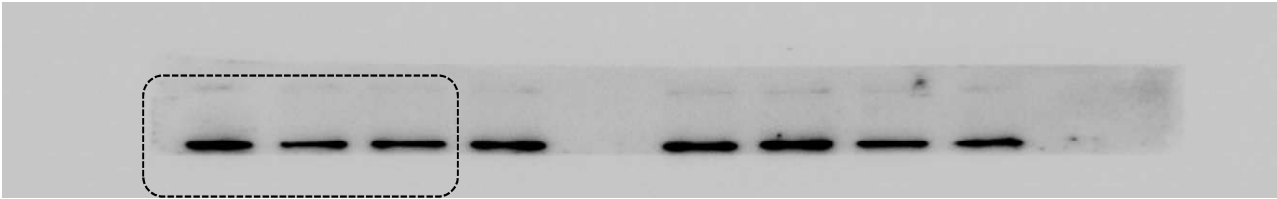

CPT1A

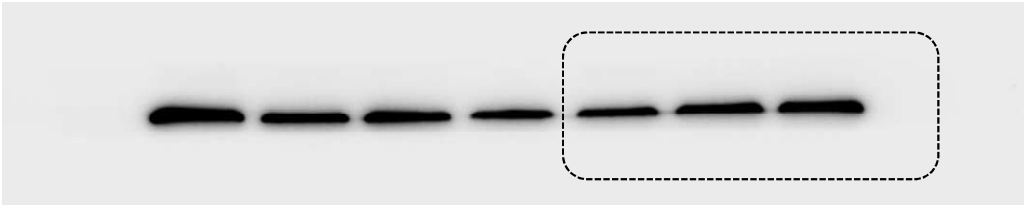

β-actin

Supplement: fig3-figsupp2-data2 [file elife-97827-fig3-figsupp2-data2-v1.zip]

**Figure 3-figure supplement 2F**

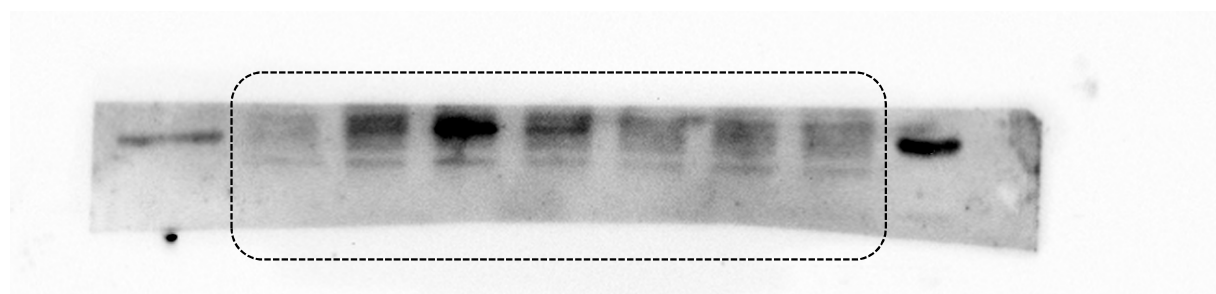

**γ-H2A.X**

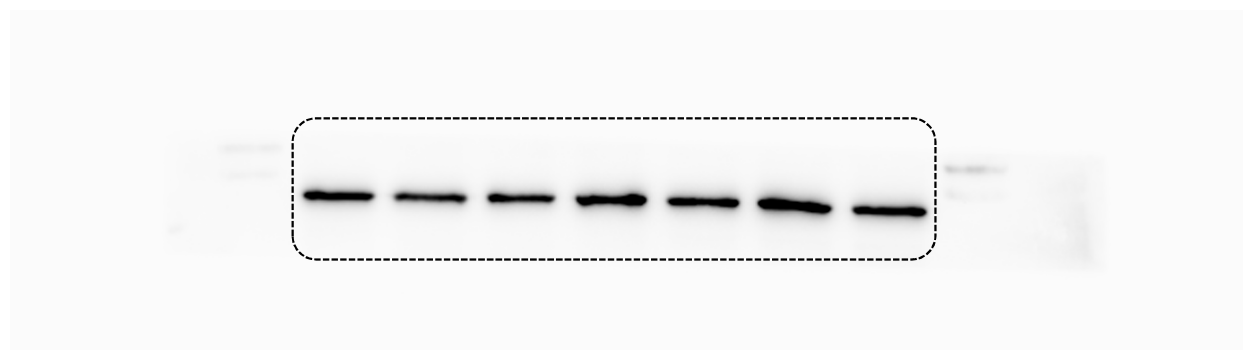

**β-actin**

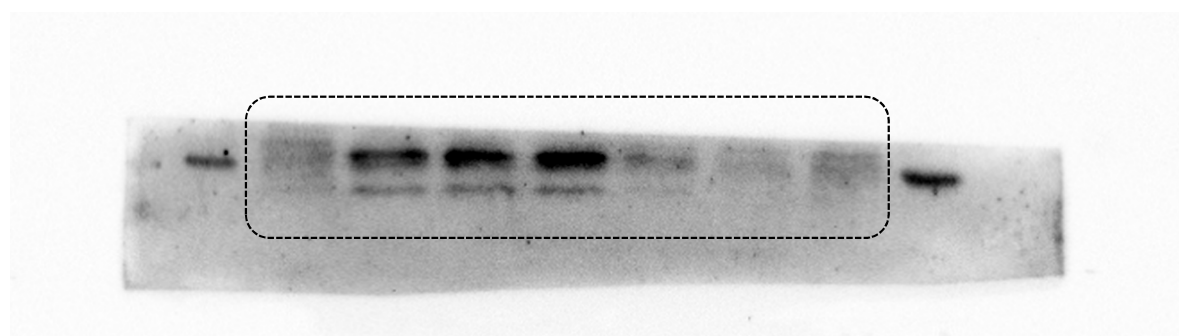

**γ-H2A.X**

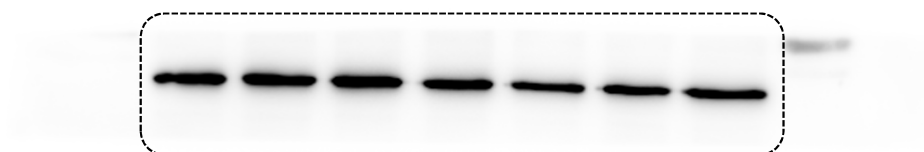

**β-actin**

Supplement: fig3-figsupp2-data2 [file elife-97827-fig3-figsupp2-data2-v1.zip]

**Figure 3-figure supplement 2E**

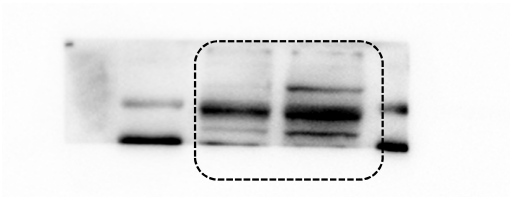

**CPT1A**

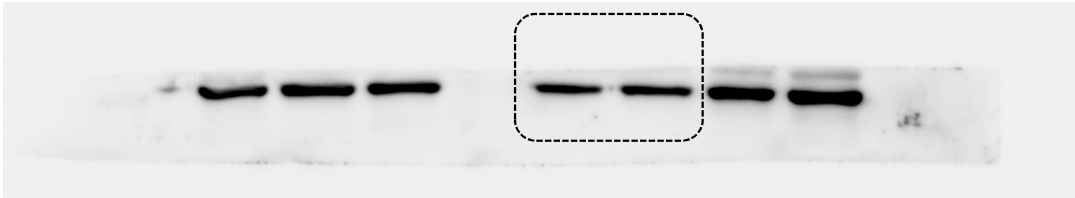

**β-actin**

Supplement: fig3-figsupp2-data2 [file elife-97827-fig3-figsupp2-data2-v1.zip]

**Figure 6A**

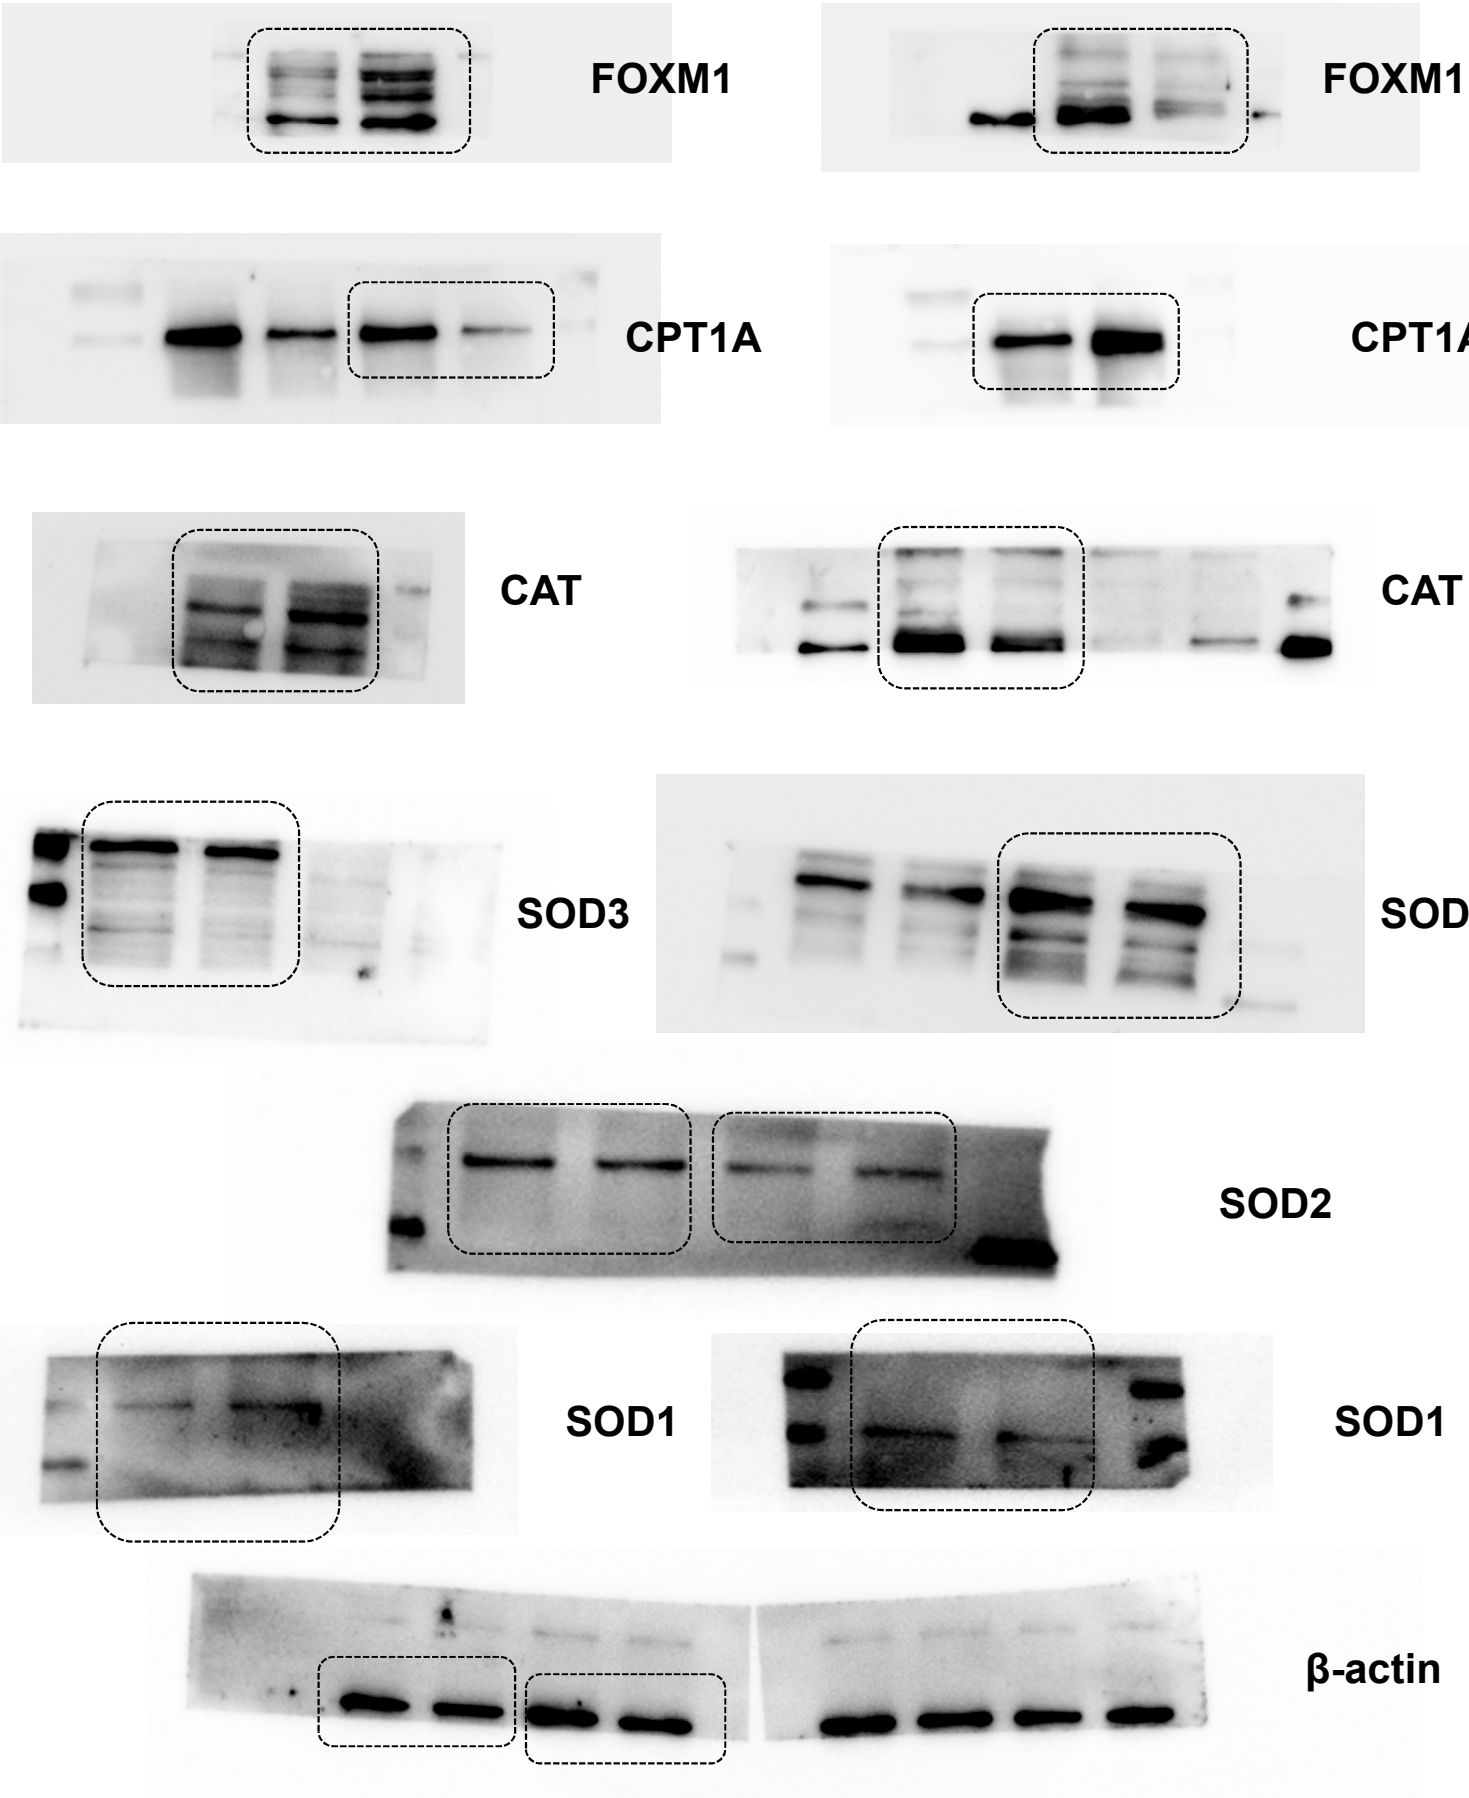

Supplement: fig6-data2 [file elife-97827-fig6-data2-v1.zip]

**Figure 6D**

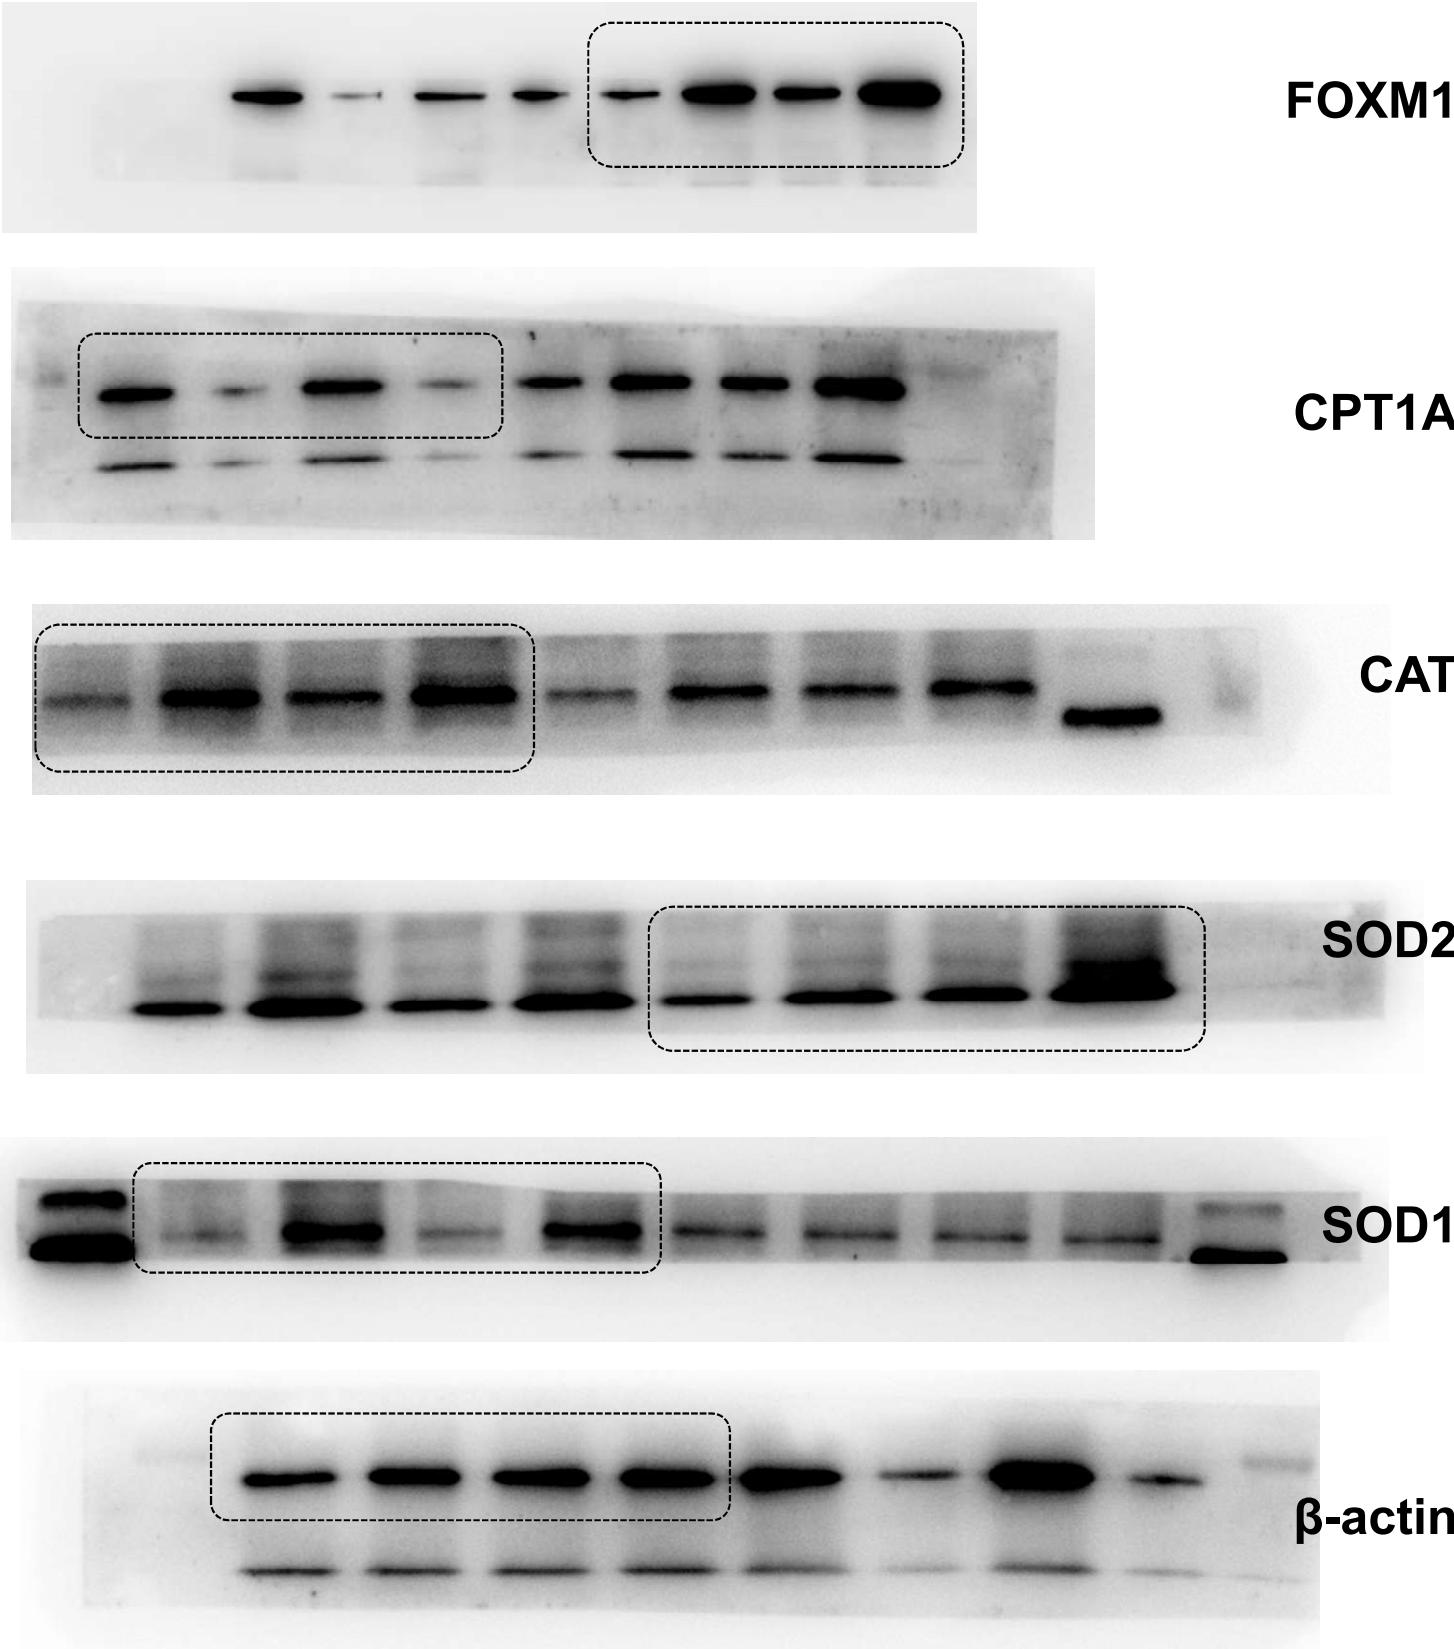

Supplement: fig6-data2 [file elife-97827-fig6-data2-v1.zip]
